# Supplementary material for: The Genomic Landscape of SMARCA4 Alterations and Associations with Outcomes in Patients with Lung Cancer
Source: Oxford University Press journal article supplement (doi:10.1158/1078-0432.ccr-20-1825), 2020-07-24
Supplement: 10780432ccr201825-sup-243136_2_supp_6414853_qd7m7r.xlsx [file 10780432ccr201825-sup-243136_2_supp_6414853_qd7m7r.xlsx]

## Sheet: Sheet1
Supplementary Table 1. Frequency of altered individual genes within SMARCA4 class 1 vs SMARCA4 class 2 subgroups.
Hugo_Symbol	group1_num_mutated	group1_frequency	group2_num_mutated	group2_frequency	num_group1_samples	num_group2_samples	sig_pval	sig	log2_OR	log2_pval	qvalue
EPHA7	0	0	4	0.0188679	195	212	0.124464	FALSE	#NAME?	3.0062	0.851176
MYD88	0	0	3	0.0141509	195	212	0.249464	FALSE	#NAME?	2.00309	0.882252
TSC1	0	0	3	0.0141509	195	212	0.249464	FALSE	#NAME?	2.00309	0.882252
NOTCH1	1	0.00512821	5	0.0235849	195	212	0.217748	FALSE	-2.20134	2.19927	0.851176
PPM1D	1	0.00512821	5	0.0235849	195	212	0.217748	FALSE	-2.20134	2.19927	0.851176
CDK6	1	0.00512821	4	0.0188679	195	212	0.37411	FALSE	-1.87941	1.41846	0.888262
ELF3	1	0.00512821	3	0.0141509	195	212	0.624466	FALSE	-1.46437	0.679305	0.888262
EPHB1	1	0.00512821	3	0.0141509	195	212	0.624466	FALSE	-1.46437	0.679305	0.888262
FLT3	1	0.00512821	3	0.0141509	195	212	0.624466	FALSE	-1.46437	0.679305	0.888262
GATA3	1	0.00512821	3	0.0141509	195	212	0.624466	FALSE	-1.46437	0.679305	0.888262
HLA-A	1	0.00512821	3	0.0141509	195	212	0.624466	FALSE	-1.46437	0.679305	0.888262
MAP2K4	1	0.00512821	3	0.0141509	195	212	0.624466	FALSE	-1.46437	0.679305	0.888262
MEN1	1	0.00512821	3	0.0141509	195	212	0.624466	FALSE	-1.46437	0.679305	0.888262
NOTCH2	1	0.00512821	4	0.0188679	195	212	0.37411	FALSE	-1.87941	1.41846	0.888262
NRAS	1	0.00512821	3	0.0141509	195	212	0.624466	FALSE	-1.46437	0.679305	0.888262
PARK2	1	0.00512821	4	0.0188679	195	212	0.37411	FALSE	-1.87941	1.41846	0.888262
PTPRS	1	0.00512821	4	0.0188679	195	212	0.37411	FALSE	-1.87941	1.41846	0.888262
TCF3	1	0.00512821	4	0.0188679	195	212	0.37411	FALSE	-1.87941	1.41846	0.888262
ANKRD11	2	0.0102564	0	0	195	212	0.228937	FALSE	Inf	2.12698	0.851176
ASXL2	2	0.0102564	0	0	195	212	0.228937	FALSE	Inf	2.12698	0.851176
ETV6	2	0.0102564	0	0	195	212	0.228937	FALSE	Inf	2.12698	0.851176
IL7R	2	0.0102564	0	0	195	212	0.228937	FALSE	Inf	2.12698	0.851176
INHBA	2	0.0102564	0	0	195	212	0.228937	FALSE	Inf	2.12698	0.851176
MLH1	2	0.0102564	0	0	195	212	0.228937	FALSE	Inf	2.12698	0.851176
MSH2	2	0.0102564	0	0	195	212	0.228937	FALSE	Inf	2.12698	0.851176
NFKBIA	2	0.0102564	0	0	195	212	0.228937	FALSE	Inf	2.12698	0.851176
PARP1	2	0.0102564	0	0	195	212	0.228937	FALSE	Inf	2.12698	0.851176
POLD1	2	0.0102564	0	0	195	212	0.228937	FALSE	Inf	2.12698	0.851176
TRAF2	2	0.0102564	0	0	195	212	0.228937	FALSE	Inf	2.12698	0.851176
ARID1B	2	0.0102564	1	0.00471698	195	212	0.60898	FALSE	1.12059	0.715533	0.888262
AURKA	2	0.0102564	1	0.00471698	195	212	0.60898	FALSE	1.12059	0.715533	0.888262
AXIN2	2	0.0102564	1	0.00471698	195	212	0.60898	FALSE	1.12059	0.715533	0.888262
BCOR	2	0.0102564	1	0.00471698	195	212	0.60898	FALSE	1.12059	0.715533	0.888262
CCND2	2	0.0102564	1	0.00471698	195	212	0.60898	FALSE	1.12059	0.715533	0.888262
CDK12	2	0.0102564	1	0.00471698	195	212	0.60898	FALSE	1.12059	0.715533	0.888262
DICER1	2	0.0102564	5	0.0235849	195	212	0.451961	FALSE	-1.20134	1.14573	0.888262
FUBP1	2	0.0102564	1	0.00471698	195	212	0.60898	FALSE	1.12059	0.715533	0.888262
NCOR1	2	0.0102564	1	0.00471698	195	212	0.60898	FALSE	1.12059	0.715533	0.888262
NF2	2	0.0102564	6	0.0283019	195	212	0.287664	FALSE	-1.46437	1.79754	0.888262
PAX5	2	0.0102564	6	0.0283019	195	212	0.287664	FALSE	-1.46437	1.79754	0.888262
ROS1	2	0.0102564	1	0.00471698	195	212	0.60898	FALSE	1.12059	0.715533	0.888262
TBX3	2	0.0102564	1	0.00471698	195	212	0.60898	FALSE	1.12059	0.715533	0.888262
BRCA1	2	0.0102564	4	0.0188679	195	212	0.686835	FALSE	-0.87941	0.541965	0.889206
TGFBR2	2	0.0102564	4	0.0188679	195	212	0.686835	FALSE	-0.87941	0.541965	0.889206
AMER1	2	0.0102564	2	0.00943396	195	212	1	FALSE	0.12059	0	1
DIS3	2	0.0102564	2	0.00943396	195	212	1	FALSE	0.12059	0	1
ERCC5	2	0.0102564	3	0.0141509	195	212	1	FALSE	-0.464372	0	1
KDM5A	2	0.0102564	2	0.00943396	195	212	1	FALSE	0.12059	0	1
MAX	2	0.0102564	3	0.0141509	195	212	1	FALSE	-0.464372	0	1
MSH6	2	0.0102564	2	0.00943396	195	212	1	FALSE	0.12059	0	1
NBN	2	0.0102564	3	0.0141509	195	212	1	FALSE	-0.464372	0	1
PIK3R2	2	0.0102564	3	0.0141509	195	212	1	FALSE	-0.464372	0	1
RAC1	2	0.0102564	2	0.00943396	195	212	1	FALSE	0.12059	0	1
RICTOR	2	0.0102564	2	0.00943396	195	212	1	FALSE	0.12059	0	1
RUNX1	2	0.0102564	3	0.0141509	195	212	1	FALSE	-0.464372	0	1
SPRED1	2	0.0102564	2	0.00943396	195	212	1	FALSE	0.12059	0	1
U2AF1	2	0.0102564	2	0.00943396	195	212	1	FALSE	0.12059	0	1
ASXL1	3	0.0153846	0	0	195	212	0.109098	FALSE	Inf	3.1963	0.851176
FANCA	3	0.0153846	0	0	195	212	0.109098	FALSE	Inf	3.1963	0.851176
KDM6A	3	0.0153846	0	0	195	212	0.109098	FALSE	Inf	3.1963	0.851176
MET	3	0.0153846	9	0.0424528	195	212	0.144275	FALSE	-1.46437	2.7931	0.851176
ATR	3	0.0153846	7	0.0330189	195	212	0.342008	FALSE	-1.1018	1.5479	0.888262
CIC	3	0.0153846	6	0.0283019	195	212	0.506421	FALSE	-0.87941	0.981592	0.888262
EPHA3	3	0.0153846	2	0.00943396	195	212	0.673854	FALSE	0.705553	0.569492	0.888262
FBXW7	3	0.0153846	1	0.00471698	195	212	0.353462	FALSE	1.70555	1.50037	0.888262
FGFR3	3	0.0153846	1	0.00471698	195	212	0.353462	FALSE	1.70555	1.50037	0.888262
FOXP1	3	0.0153846	2	0.00943396	195	212	0.673854	FALSE	0.705553	0.569492	0.888262
GLI1	3	0.0153846	2	0.00943396	195	212	0.673854	FALSE	0.705553	0.569492	0.888262
GRIN2A	3	0.0153846	1	0.00471698	195	212	0.353462	FALSE	1.70555	1.50037	0.888262
LATS1	3	0.0153846	2	0.00943396	195	212	0.673854	FALSE	0.705553	0.569492	0.888262
MAP2K1	3	0.0153846	2	0.00943396	195	212	0.673854	FALSE	0.705553	0.569492	0.888262
PPP2R1A	3	0.0153846	2	0.00943396	195	212	0.673854	FALSE	0.705553	0.569492	0.888262
RECQL4	3	0.0153846	2	0.00943396	195	212	0.673854	FALSE	0.705553	0.569492	0.888262
RNF43	3	0.0153846	1	0.00471698	195	212	0.353462	FALSE	1.70555	1.50037	0.888262
SPEN	3	0.0153846	2	0.00943396	195	212	0.673854	FALSE	0.705553	0.569492	0.888262
TET2	3	0.0153846	6	0.0283019	195	212	0.506421	FALSE	-0.87941	0.981592	0.888262
WT1	3	0.0153846	2	0.00943396	195	212	0.673854	FALSE	0.705553	0.569492	0.888262
ATRX	3	0.0153846	5	0.0235849	195	212	0.725789	FALSE	-0.616375	0.462377	0.931322
AGO2	3	0.0153846	3	0.0141509	195	212	1	FALSE	0.12059	1.60171e-16	1
CCND3	3	0.0153846	4	0.0188679	195	212	1	FALSE	-0.294447	0	1
POLE	3	0.0153846	3	0.0141509	195	212	1	FALSE	0.12059	1.60171e-16	1
VEGFA	3	0.0153846	3	0.0141509	195	212	1	FALSE	0.12059	1.60171e-16	1
PMS1	4	0.0205128	0	0	195	212	0.0518487	FALSE	Inf	4.26955	0.777951
RAD50	4	0.0205128	0	0	195	212	0.0518487	FALSE	Inf	4.26955	0.777951
CCNE1	4	0.0205128	10	0.0471698	195	212	0.177398	FALSE	-1.20134	2.49494	0.851176
DDR2	4	0.0205128	1	0.00471698	195	212	0.198429	FALSE	2.12059	2.33331	0.851176
NTRK1	4	0.0205128	1	0.00471698	195	212	0.198429	FALSE	2.12059	2.33331	0.851176
ALK	4	0.0205128	2	0.00943396	195	212	0.43249	FALSE	1.12059	1.20926	0.888262
CBL	4	0.0205128	2	0.00943396	195	212	0.43249	FALSE	1.12059	1.20926	0.888262
EZH2	4	0.0205128	2	0.00943396	195	212	0.43249	FALSE	1.12059	1.20926	0.888262
FAT1	4	0.0205128	8	0.0377358	195	212	0.385649	FALSE	-0.87941	1.37464	0.888262
KMT2C	4	0.0205128	9	0.0424528	195	212	0.264624	FALSE	-1.04933	1.91798	0.888262
PBRM1	4	0.0205128	7	0.0330189	195	212	0.547239	FALSE	-0.686765	0.869758	0.888262
RET	4	0.0205128	2	0.00943396	195	212	0.43249	FALSE	1.12059	1.20926	0.888262
ZFHX3	4	0.0205128	2	0.00943396	195	212	0.43249	FALSE	1.12059	1.20926	0.888262
AKT2	4	0.0205128	4	0.0188679	195	212	1	FALSE	0.12059	1.60171e-16	1
CTNNB1	4	0.0205128	5	0.0235849	195	212	1	FALSE	-0.201338	0	1
EP300	4	0.0205128	5	0.0235849	195	212	1	FALSE	-0.201338	0	1
CDKN1B	5	0.025641	0	0	195	212	0.0245735	FALSE	Inf	5.34675	0.593859
LATS2	5	0.025641	1	0.00471698	195	212	0.108668	FALSE	2.44252	3.202	0.851176
NKX3-1	5	0.025641	1	0.00471698	195	212	0.108668	FALSE	2.44252	3.202	0.851176
CDK4	5	0.025641	3	0.0141509	195	212	0.48814	FALSE	0.857556	1.03463	0.888262
FGFR1	5	0.025641	3	0.0141509	195	212	0.48814	FALSE	0.857556	1.03463	0.888262
DNMT3A	5	0.025641	4	0.0188679	195	212	0.742695	FALSE	0.442518	0.429157	0.936442
KDM5C	5	0.025641	4	0.0188679	195	212	0.742695	FALSE	0.442518	0.429157	0.936442
CCND1	5	0.025641	6	0.0283019	195	212	1	FALSE	-0.142444	0	1
FGF19	5	0.025641	6	0.0283019	195	212	1	FALSE	-0.142444	0	1
BRCA2	6	0.0307692	2	0.00943396	195	212	0.16022	FALSE	1.70555	2.64187	0.851176
NOTCH3	6	0.0307692	2	0.00943396	195	212	0.16022	FALSE	1.70555	2.64187	0.851176
APC	6	0.0307692	11	0.0518868	195	212	0.329389	FALSE	-0.753879	1.60213	0.888262
ARID2	6	0.0307692	4	0.0188679	195	212	0.529999	FALSE	0.705553	0.915939	0.888262
MED12	6	0.0307692	4	0.0188679	195	212	0.529999	FALSE	0.705553	0.915939	0.888262
PIK3R1	6	0.0307692	3	0.0141509	195	212	0.321483	FALSE	1.12059	1.63719	0.888262
SETD2	6	0.0307692	10	0.0471698	195	212	0.451931	FALSE	-0.616375	1.14583	0.888262
B2M	7	0.0358974	2	0.00943396	195	212	0.0936884	FALSE	1.92795	3.41599	0.851176
PTEN	7	0.0358974	3	0.0141509	195	212	0.205263	FALSE	1.34298	2.28445	0.851176
KMT2D	7	0.0358974	11	0.0518868	195	212	0.477887	FALSE	-0.531487	1.06526	0.888262
RASA1	7	0.0358974	5	0.0235849	195	212	0.562939	FALSE	0.606017	0.828951	0.888262
NFE2L2	8	0.0410256	2	0.00943396	195	212	0.0536518	FALSE	2.12059	4.22023	0.777951
CREBBP	8	0.0410256	6	0.0283019	195	212	0.589723	FALSE	0.535628	0.76189	0.888262
ATM	8	0.0410256	8	0.0377358	195	212	1	FALSE	0.12059	1.60171e-16	1
ERBB2	8	0.0410256	8	0.0377358	195	212	1	FALSE	0.12059	1.60171e-16	1
MDM2	8	0.0410256	9	0.0424528	195	212	1	FALSE	-0.0493349	0	1
ARID1A	9	0.0461538	6	0.0283019	195	212	0.43248	FALSE	0.705553	1.2093	0.888262
PIK3CA	9	0.0461538	6	0.0283019	195	212	0.43248	FALSE	0.705553	1.2093	0.888262
PTPRT	9	0.0461538	5	0.0235849	195	212	0.278632	FALSE	0.968587	1.84357	0.888262
SMAD4	9	0.0461538	6	0.0283019	195	212	0.43248	FALSE	0.705553	1.2093	0.888262
MCL1	10	0.0512821	3	0.0141509	195	212	0.0462324	FALSE	1.85756	4.43495	0.777951
MGA	10	0.0512821	12	0.0566038	195	212	0.830538	FALSE	-0.142444	0.267882	1
PTPRD	11	0.0564103	11	0.0518868	195	212	1	FALSE	0.12059	0	1
BRAF	12	0.0615385	10	0.0471698	195	212	0.661763	FALSE	0.383625	0.595613	0.888262
FOXA1	14	0.0717949	4	0.0188679	195	212	0.0138345	FALSE	1.92795	6.17559	0.4012
MYC	14	0.0717949	16	0.0754717	195	212	1	FALSE	-0.0720549	0	1
NKX2-1	15	0.0769231	3	0.0141509	195	212	0.00276243	FALSE	2.44252	8.49985	0.193413
NF1	15	0.0769231	13	0.0613208	195	212	0.561954	FALSE	0.327041	0.831476	0.888262
RB1	15	0.0769231	13	0.0613208	195	212	0.561954	FALSE	0.327041	0.831476	0.888262
TERT	16	0.0820513	8	0.0377358	195	212	0.0901623	FALSE	1.12059	3.47133	0.851176
RBM10	22	0.112821	15	0.0707547	195	212	0.16794	FALSE	0.673131	2.57399	0.851176
KEAP1	29	0.148718	54	0.254717	195	212	0.00955085	FALSE	-0.776316	6.71015	0.346218
EGFR	31	0.158974	14	0.0660377	195	212	0.00400165	FALSE	1.26743	7.96519	0.193413
CDKN2B	34	0.174359	31	0.146226	195	212	0.498807	FALSE	0.253857	1.00345	0.888262
STK11	51	0.261538	90	0.424528	195	212	0.000585784	FALSE	-0.698838	10.7373	0.0849387
CDKN2A	56	0.287179	61	0.287736	195	212	1	FALSE	-0.00279227	0	1
KRAS	69	0.353846	75	0.353774	195	212	1	FALSE	0.000295907	1.60171e-16	1
TP53	105	0.538462	124	0.584906	195	212	0.368842	FALSE	-0.119361	1.43892	0.888262
